# Supplementary material for: When and how to satisfice: an experimental investigation
Source: Springer Nature journal article supplement (doi:10.1007/s11238-017-9600-5), 2017-04-27

APPENDIX (not intended for publication)

Table 6. Actual vs Theoretical Decisions in Treatment 1

|                 |                 | Subjects' choices        |                        |                      |              |
|-----------------|-----------------|--------------------------|------------------------|----------------------|--------------|
|                 |                 | No Deliberation          | Satisfice              | Optimise             | Totals       |
| Manski's theory | No Deliberation | 524<br>(87.33%)          | 64<br>(10.67%)         | 12<br>(2.00%)        | 600          |
|                 | Satisfice       | 522<br>(43.50%)          | 645<br>(53.75%)        | 33<br>(2.75%)        | 1,200        |
|                 | Optimise        | 452<br>(75.33%)          | 100<br>(16.67%)        | 48<br>(8.00%)        | 600          |
| <b>Totals</b>   |                 | <b>1,498</b><br>(62.42%) | <b>809</b><br>(33.71%) | <b>93</b><br>(3.88%) | <b>2,400</b> |

Note: the number in parentheses indicates the percentage by row.

Table 7. Actual vs Theoretical Decisions in Treatment 2

|                 |                 | Subjects' choices      |                          |                       |              |
|-----------------|-----------------|------------------------|--------------------------|-----------------------|--------------|
|                 |                 | No Deliberation        | Satisfice                | Optimise              | Totals       |
| Manski's theory | No Deliberation | 193<br>(80.42%)        | 34<br>(14.17%)           | 13<br>(5.42%)         | 240          |
|                 | Satisfice       | 557<br>(29.01%)        | 1,250<br>(65.10%)        | 113<br>(5.89%)        | 1,920        |
|                 | Optimise        | 146<br>(60.83%)        | 61<br>(25.42%)           | 33<br>(13.75%)        | 240          |
| <b>Totals</b>   |                 | <b>896</b><br>(37.33%) | <b>1,345</b><br>(56.04%) | <b>159</b><br>(6.63%) | <b>2,400</b> |

Note: the number in parentheses indicates the percentage by row.

Figure 4: Uniform Risky distributions

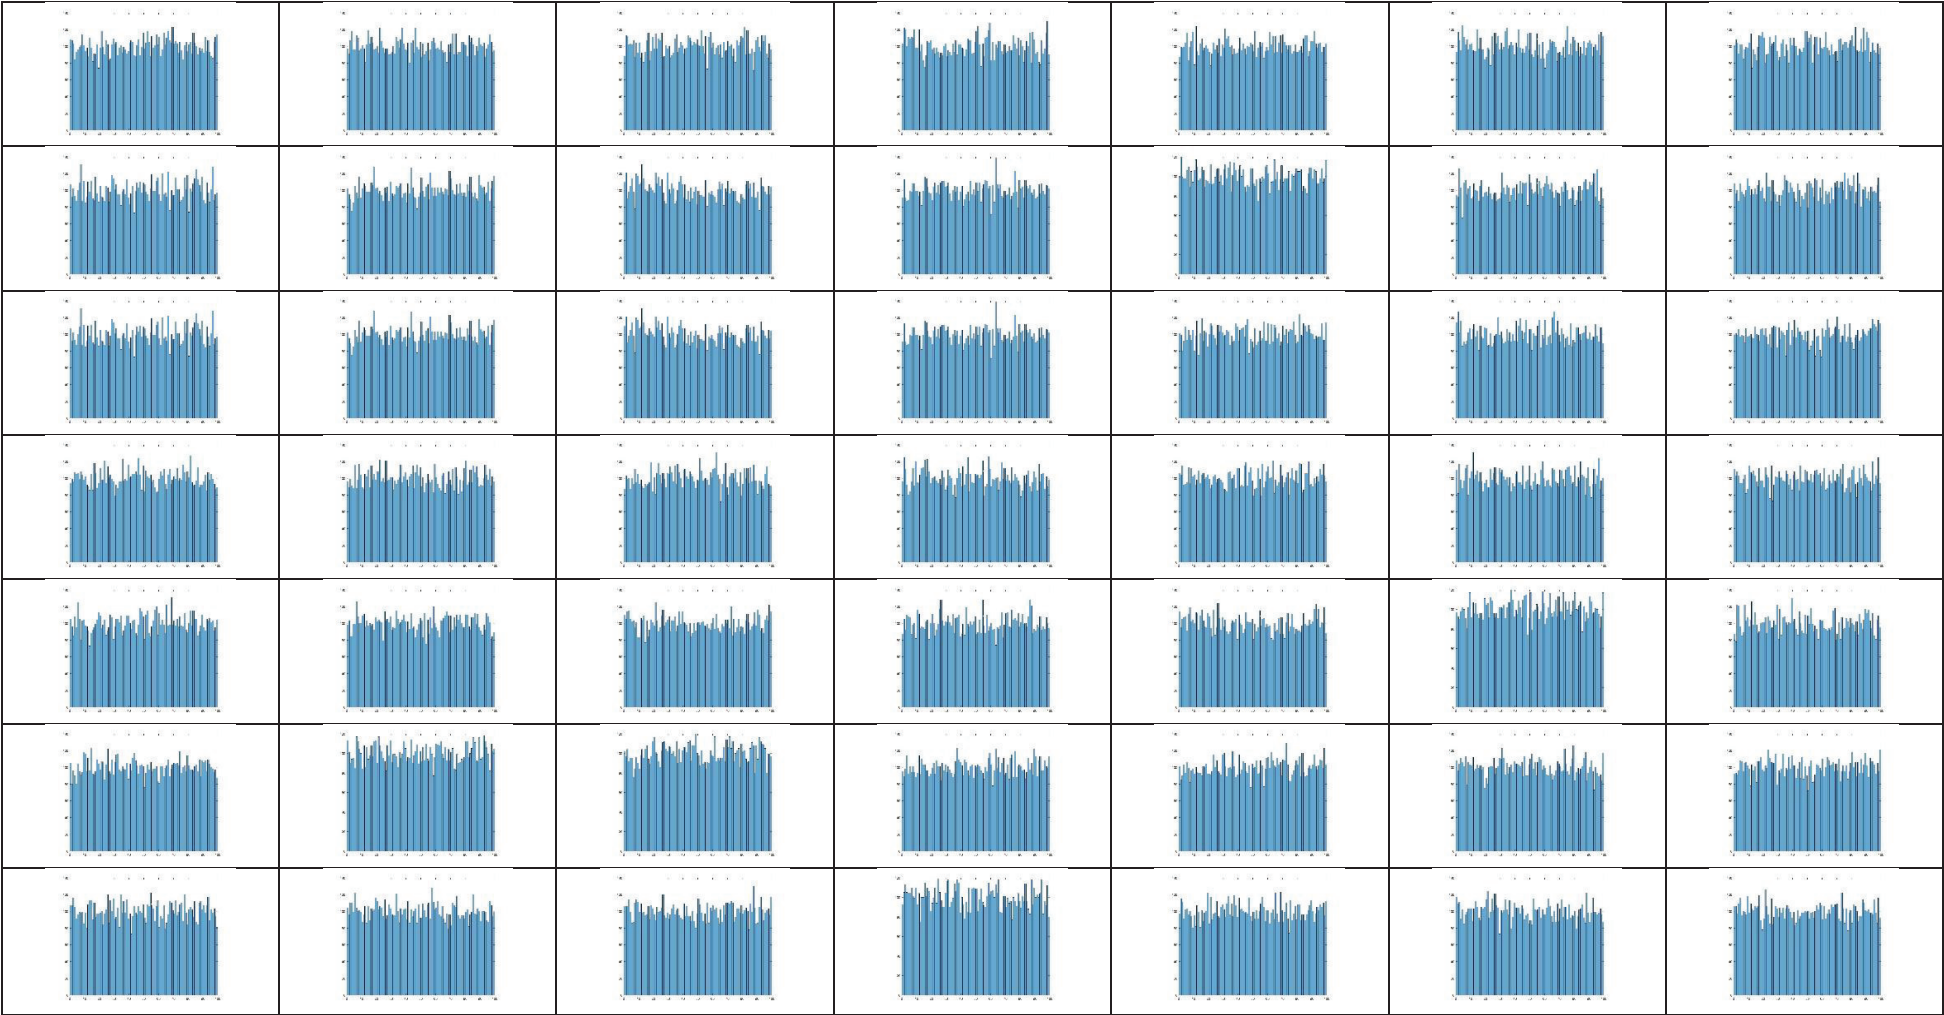

Figure 5: Ambiguous Distributions

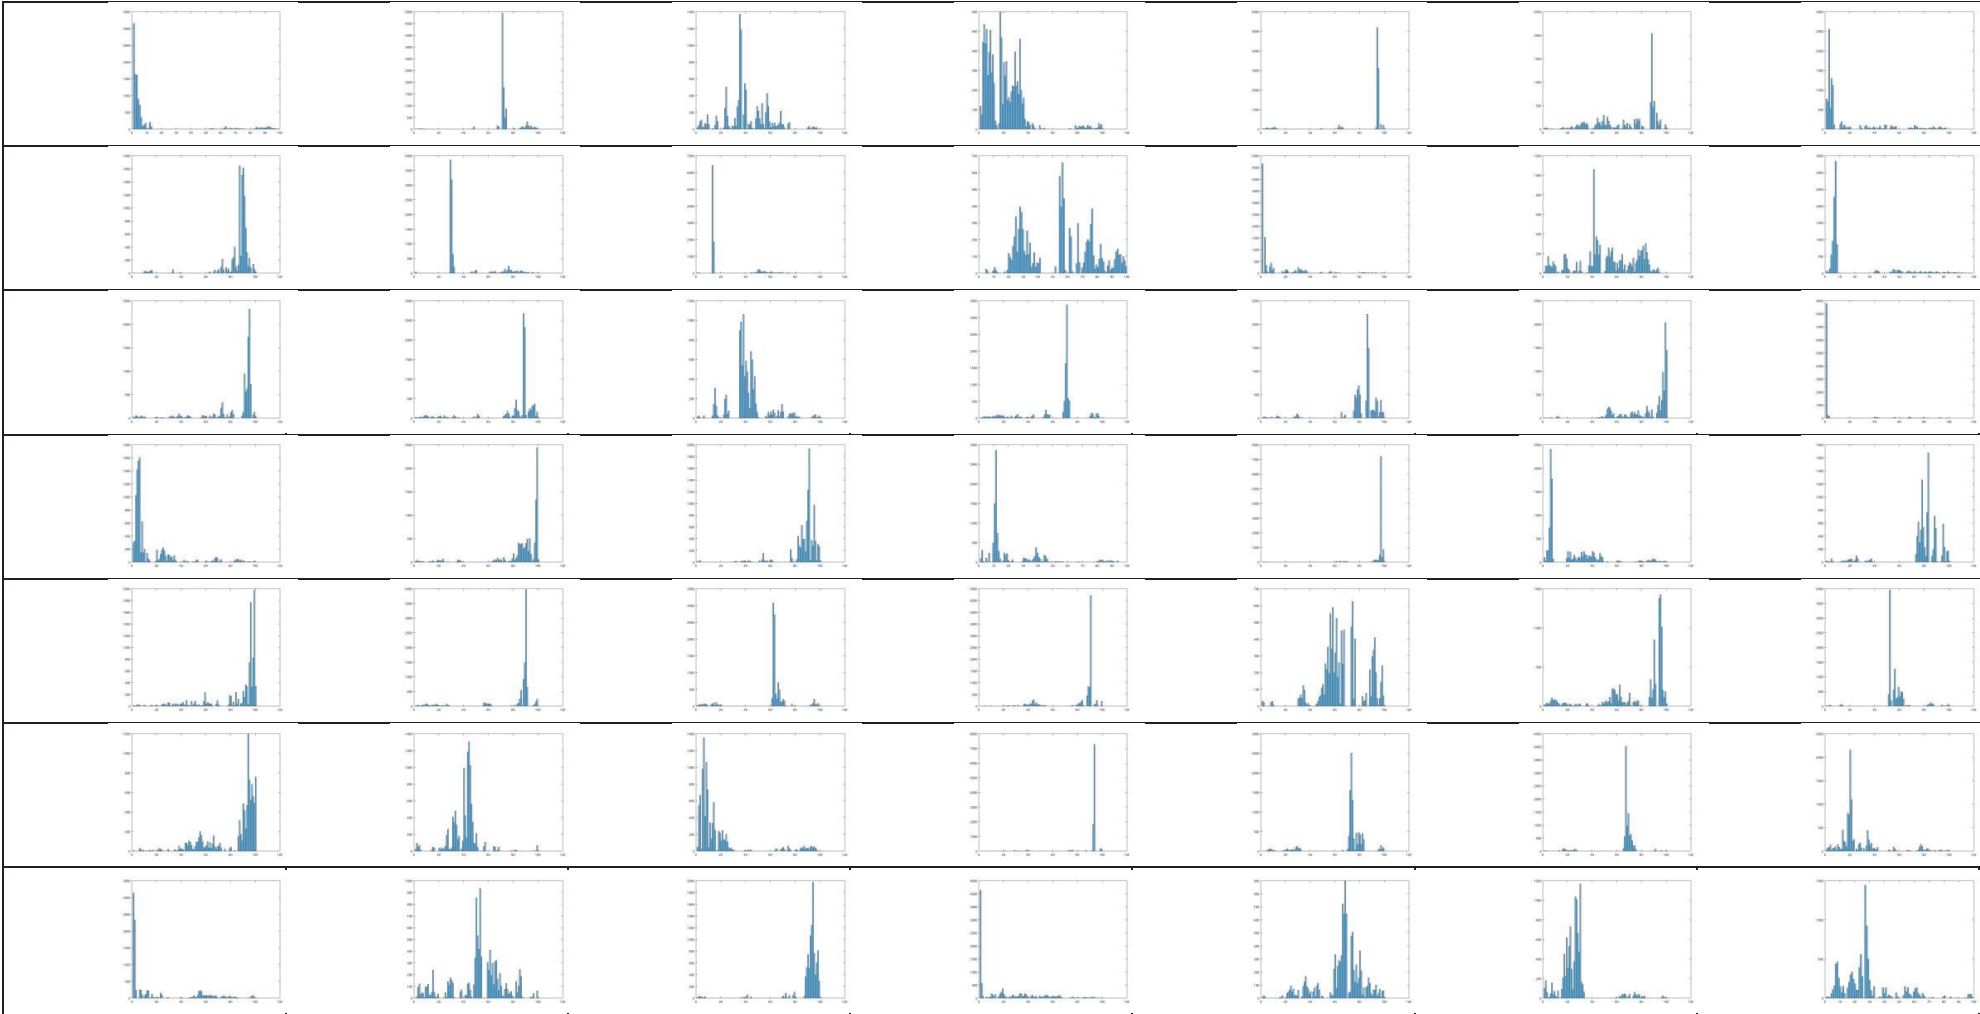

Supplement: MOESM1 [file 12252042]
